# Supplementary material for: Membrane degassing with the combination of sweep gas and vacuum pressure for ammonia removal
Source: Royal Society of Chemistry journal article supplement (doi:10.1039/d2ew00822j), 2022-12-01
Supplement: d2ew00822j1.pdf [file d2ew00822j1.pdf]

## Supporting Information

**Table S1.** Membrane characteristics of Liqui-Cel Extra-Flow (2.5 × 8) <sup>1</sup>

| Characteristics (unit) | Value         |
|------------------------|---------------|
| Area (m <sup>2</sup> ) | 1.4           |
| Shell side volume (L)  | 0.4           |
| Tube side volume (L)   | 0.15          |
| # of Fibers            | 9,500         |
| Internal diameter (μm) | 220           |
| Outer diameter (μm)    | 300           |
| Wall thickness (μm)    | 40            |
| Material               | Polypropylene |
| Tortuosity             | 3             |
| Pore size (μm)         | 0.04          |
| Porosity (%)           | 40            |

**Table S2.** Characteristics of an opto-electronic industrial wastewater and the synthetic ammonia wastewater with similar composition. <sup>2</sup>

| Parameter                               | Ref. [2]        | This study |
|-----------------------------------------|-----------------|------------|
| COD (mg/L)                              | $100 \pm 28$    | 100        |
| TKN (mg/L)                              | $572 \pm 6.6$   | ~ 560      |
| NH <sub>4</sub> <sup>+</sup> -N (mg/L)  | $567 \pm 5.8$   | 560        |
| NO <sub>2</sub> <sup>-</sup> N (mg/L)   | -               | -          |
| NO <sub>3</sub> <sup>-</sup> N (mg/L)   | $7 \pm 5.5$     | -          |
| PO <sub>4</sub> <sup>3-</sup> -P (mg/L) | $0.7 \pm 0.7$   | -          |
| pH                                      | $9.4 \pm 0.1$   | 9.4        |
| Alkalinity (mg/L as CaCO <sub>3</sub> ) | $1,260 \pm 208$ | 1,260      |

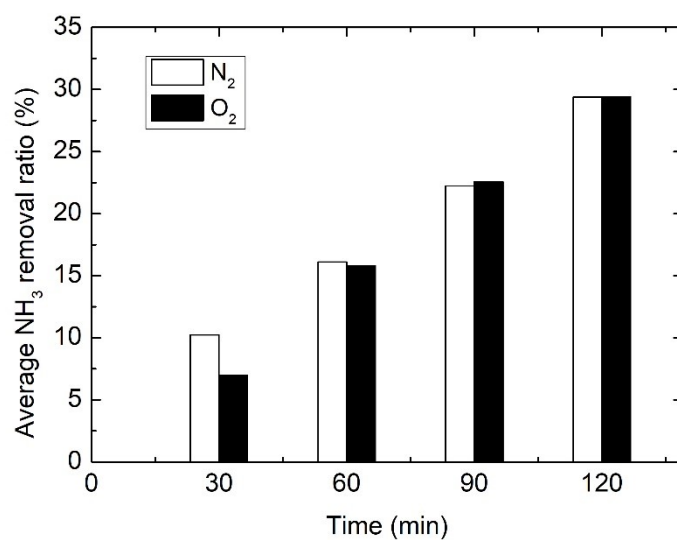

**Fig. S1** Effect of type of sweep gas on average  $\text{NH}_3$  removal ratio (Initial ammonia concentration: 530 mg/L, Temperature: 50°C, Feed water flow rate: 2.5 L/min, Sweep gas & flow rate:  $\text{N}_2$  or  $\text{O}_2$  4 L/min, Vacuum pressure: -0.7~0.8 bar, Initial pH: 10)

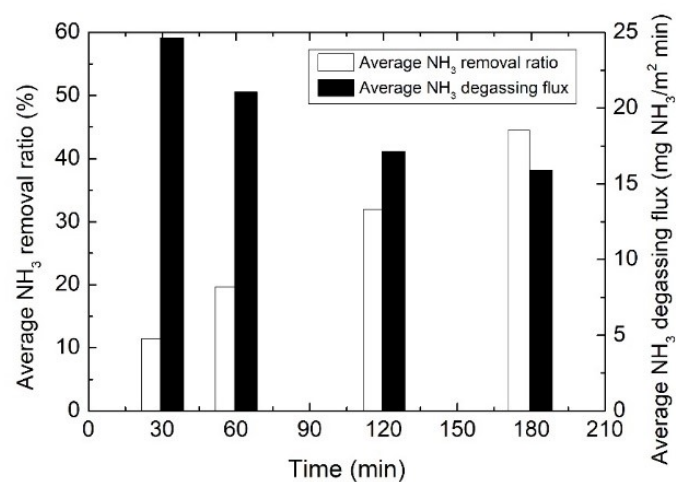

**Fig. S2** Average NH<sub>3</sub> removal ratio and average NH<sub>3</sub> degassing flux treating synthetic ammonia wastewater with similar composition of an opto-electronic industrial wastewater (Initial ammonia concentration: 560 mg/L, Temperature: 50°C, Feed water flow rate: 2.5 L/min, Sweep gas & flow rate: N<sub>2</sub> & 4 L/min, Vacuum pressure: -0.7~0.8 bar, Initial pH: 9.3).

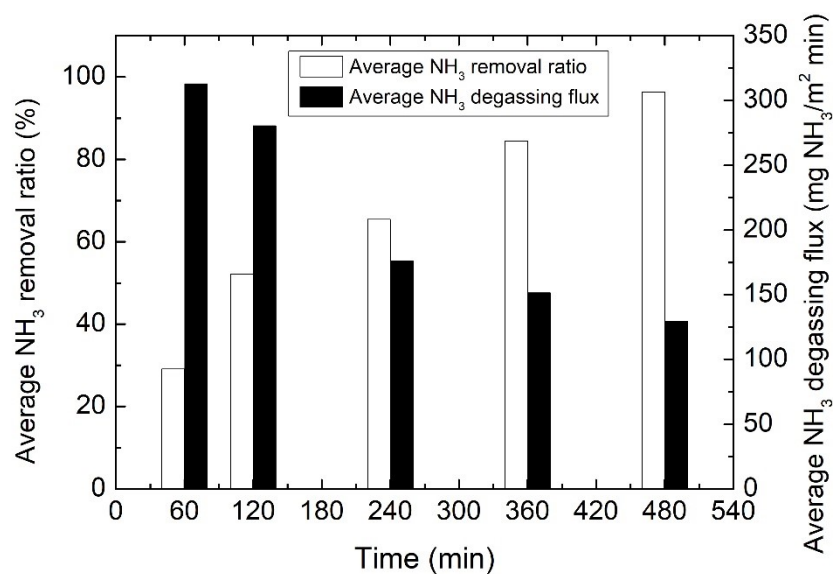

**Fig. S3** Average NH<sub>3</sub> removal ratio and average NH<sub>3</sub> degassing flux treating high concentration of ammonia (Initial ammonia concentration: 6,000 mg/L, Temperature: 50°C, Feed water flow rate: 2.5 L/min, Sweep gas & flow rate: N<sub>2</sub> & 4 L/min, Vacuum pressure: -0.7~0.8 bar, Initial pH: 10)

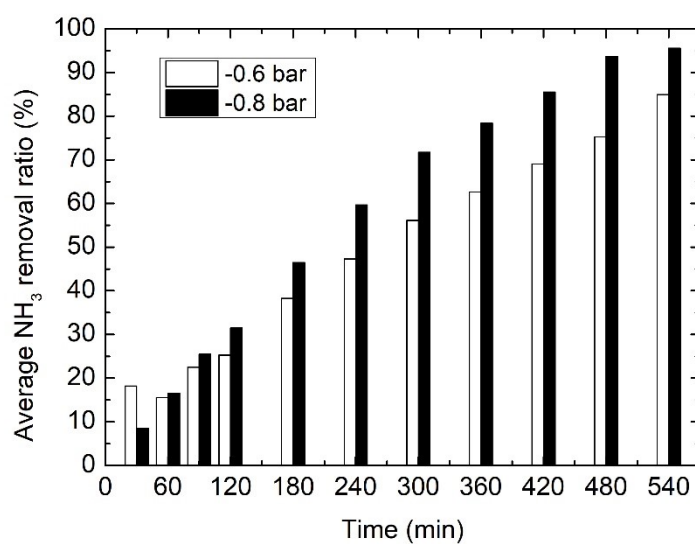

**Fig. S4** Effect of vacuum pressure on average  $\text{NH}_3$  removal ratio (Initial ammonia concentration: 530 mg/L, Temperature: 50°C, Feed water flow rate: 2.5 L/min, Sweep gas & flow rate:  $\text{N}_2$  & 4 L/min, Vacuum pressure: -0.7~0.8 bar, Initial pH: 10)

## References

1. A. C. Ni'am, Y. F. Wang, , Chen, S. W. G. M. Chang, S. J. You, Simultaneous recovery of rare earth elements from waste permanent magnets (WPMs) leach liquor by solvent extraction and hollow fiber supported liquid membrane. *Chemical Engineering and Processing-Process Intensification*, 2020, **148**, 107831.
2. A. Daverey, S. H. Su, Y. T. Huang, J. G. Lin, Nitrogen removal from opto-electronic wastewater using the simultaneous partial nitrification, anaerobic ammonium oxidation and denitrification (SNAD) process in sequencing batch reactor. *Bioresource Technology*, 2012, **113**, 225-231.
